# Supplementary material for: Structural preferences shape the entropic force of disordered protein ensembles
Source: PubMed Central journal article supplement — bioRxiv. 2023 Jan 21:2023.01.20.524980. Preprint. [Version 1] doi: 10.1101/2023.01.20.524980 (PMC9882287; doi:10.1101/2023.01.20.524980), 2023-01-21
Supplement: media-1.pdf [file media-1.pdf]

Supplementary information for:

# Structural preferences shape the entropic force of disordered protein ensembles

Feng Yu<sup>1</sup> and Shahar Sukenik<sup>1,2</sup>

1. Quantitative Systems Biology Program, University of California, Merced, California, United States
2. Department of Chemistry and Biochemistry, University of California, Merced, California, United States

Figure S1

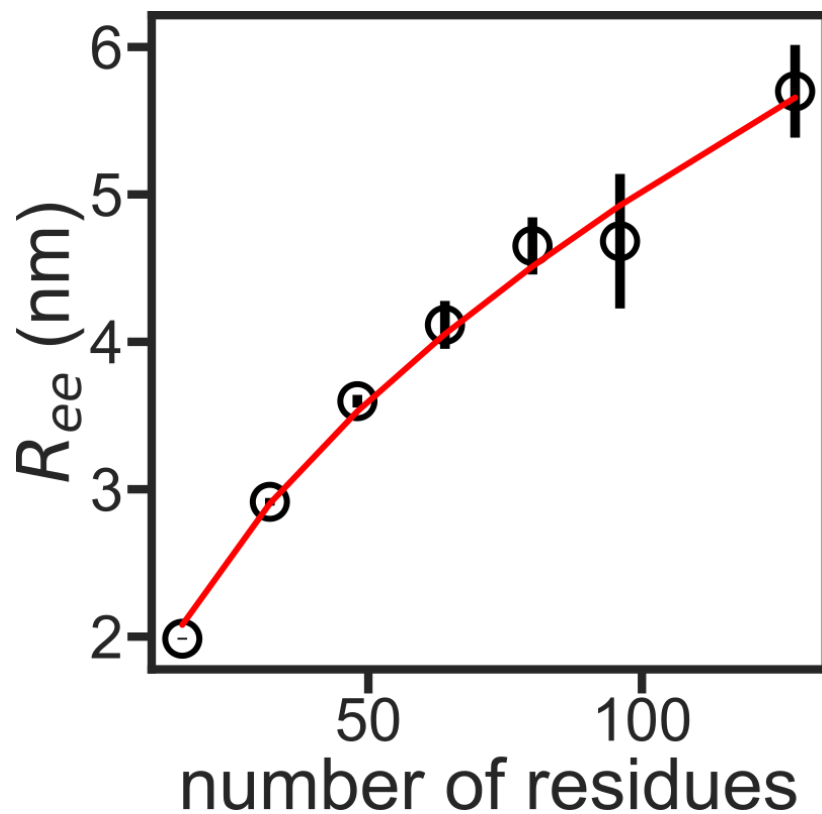

**Figure S1. GS repeats match homopolymer scaling law under buffer conditions.** The average end-to-end distance from five repeats vs the total number of residues for a series of Gly-Ser repeats, The error bars are the standard deviation of the five repeats. The red curve is the result of fitting to  $R_{ee} = R_0 N^\nu$ , with  $R_0 = 0.55 \pm 0.06$  nm and  $\nu = 0.48 \pm 0.03$ . Errors are obtained from the fit.

Figure S2

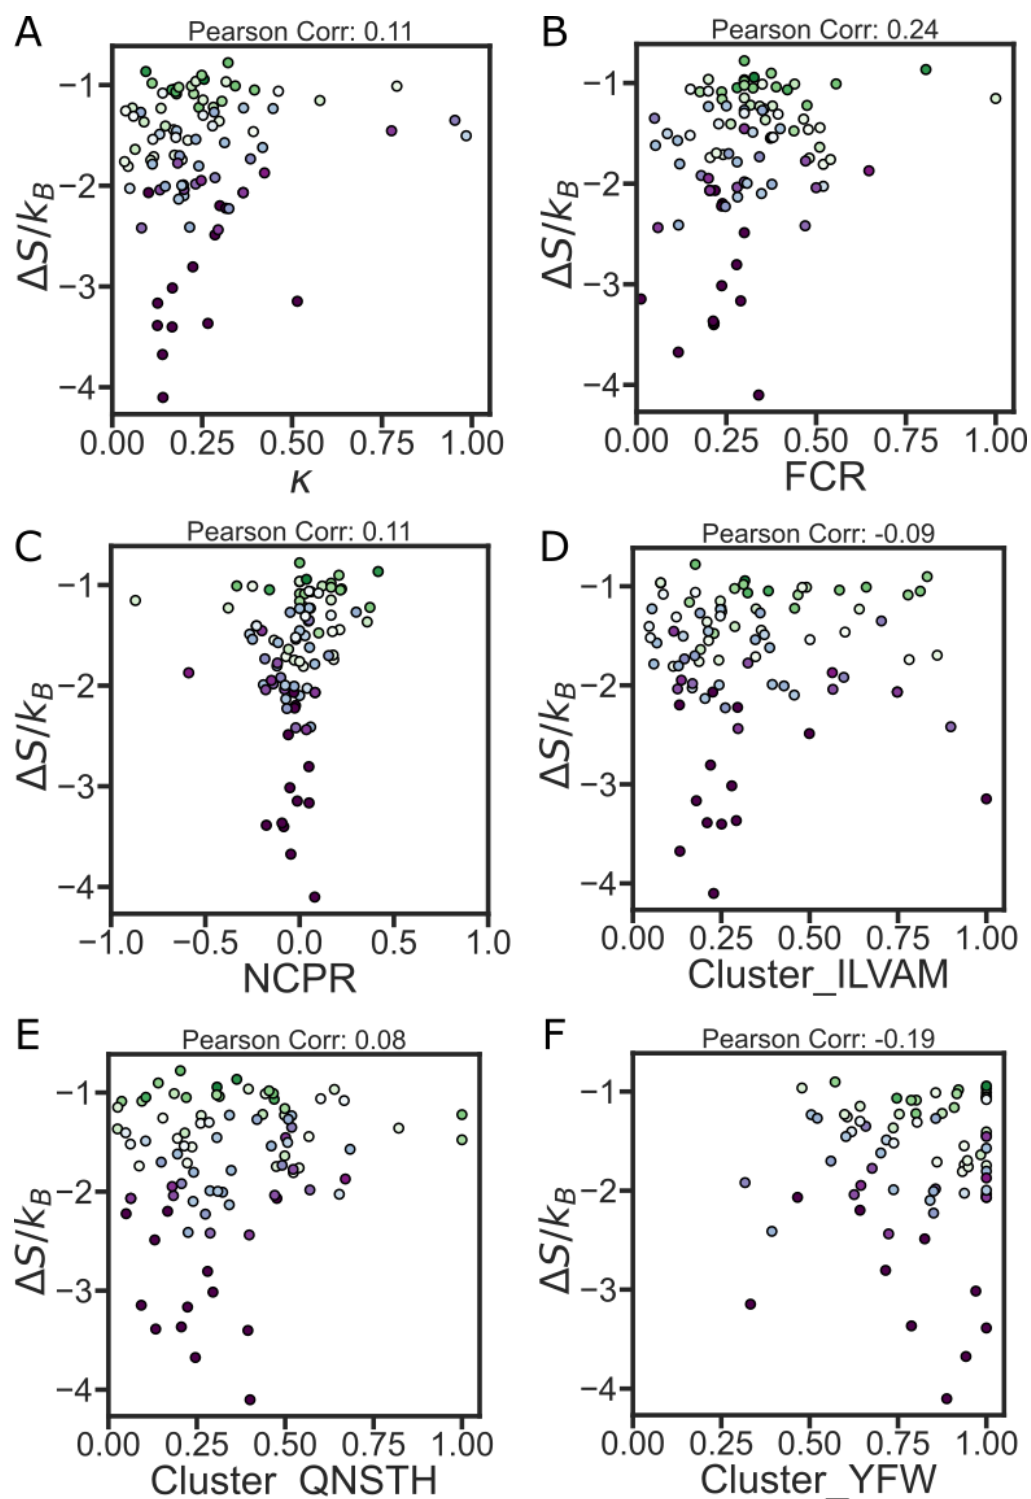

**Figure S2. Sequence features are not correlated with the entropic force strength.** The entropic force strength is plotted vs several sequence features calculated using the localCIDER python package. **(A)**  $\kappa$ : a metric for mixing of charged amino acids<sup>19</sup>, **(B)** FCR: fraction of charged residues, **(C)** NPCR: net charge per residue, **(D)** Cluster\_ILVAM: hydrophobic amino acid mixing calculated using the same algorithm as  $\kappa$ , **(E)** Cluster\_QNSTH: polar amino acid mixing calculated using the same algorithm as  $\kappa$ , **(F)** Cluster\_YFW, aromatic amino acid mixing calculated using the same algorithm as  $\kappa$ .

Figure S3

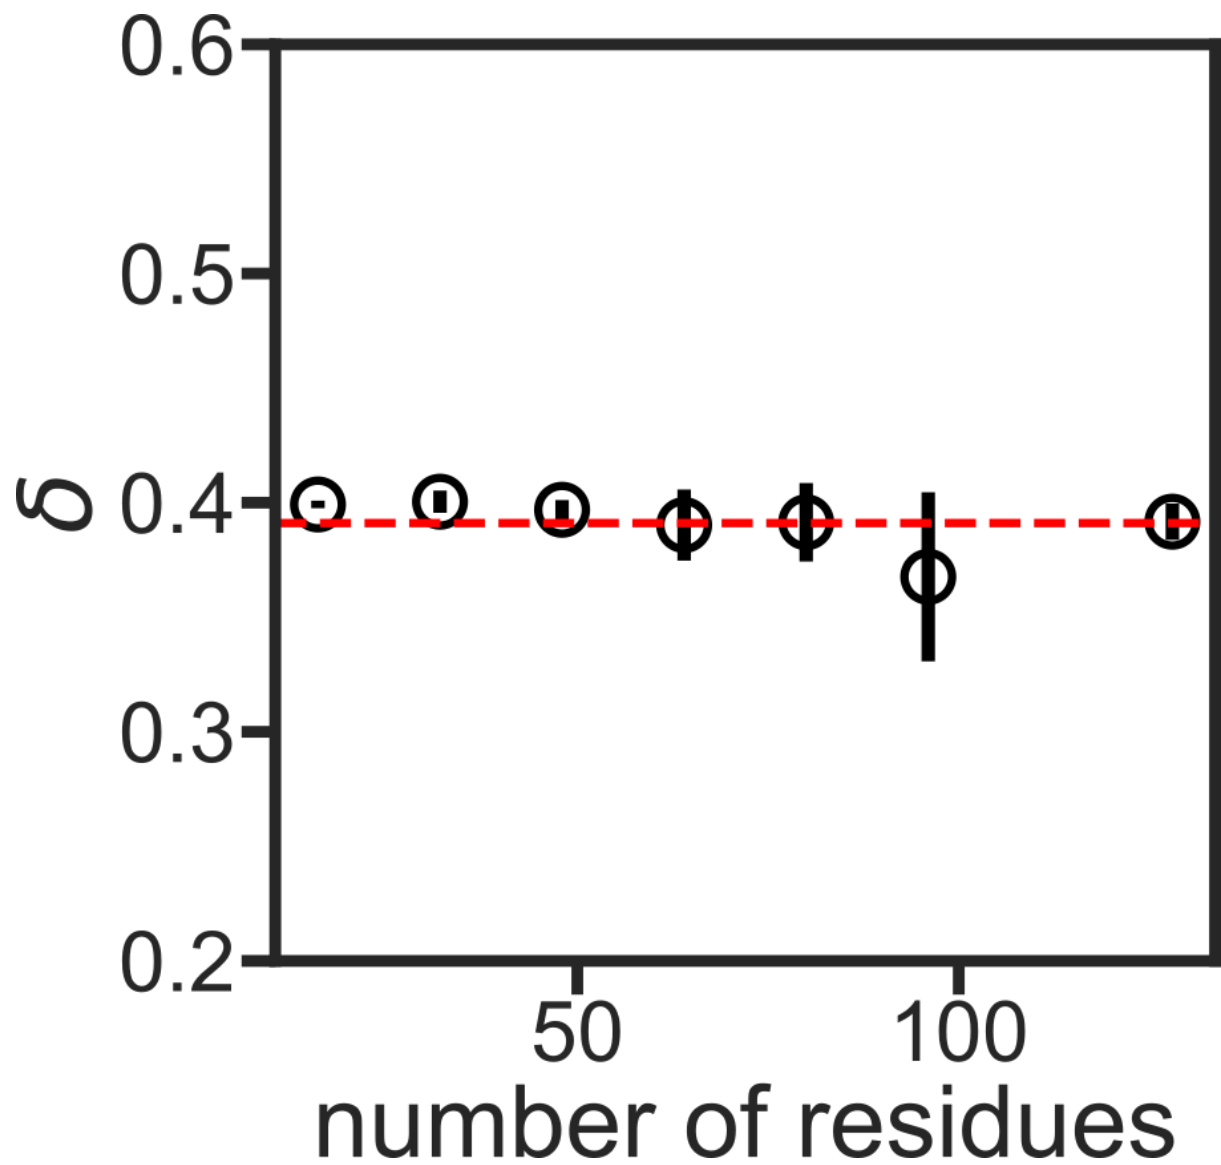

**Figure S3. GS repeat asphericity is independent of length.** The average asphericity of GS repeats vs the number of residues in the sequence. The mean of all seven data points is shown by the red line, with  $\delta = 0.39 \pm 0.01$ .

Figure S4

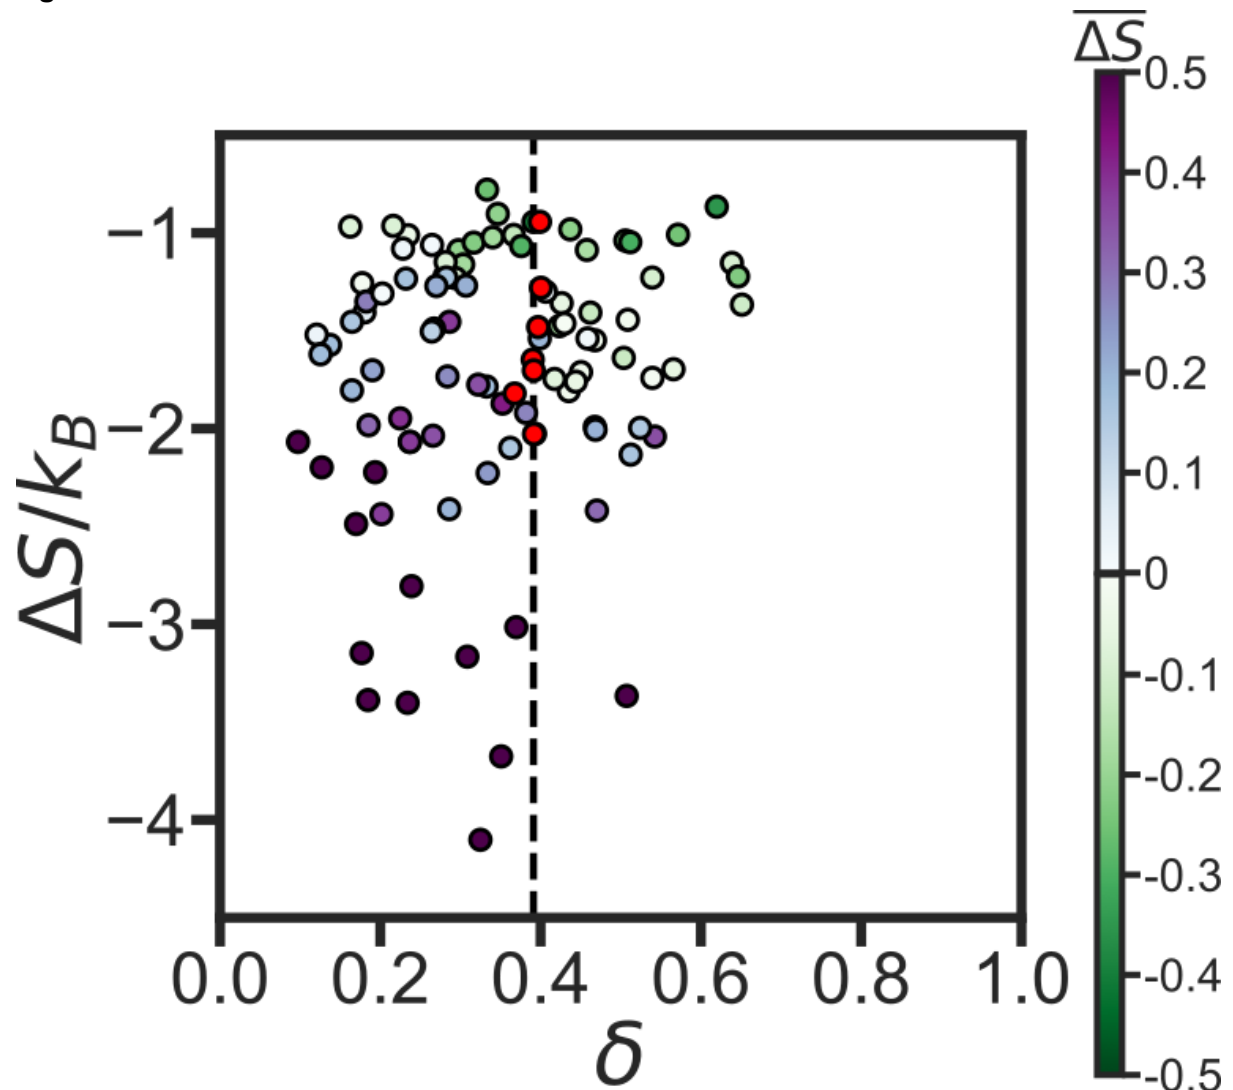

**Figure S4.** Entropic force as a function of average asphericity. The black line represents the length-independent asphericity of GS-repeats shown in **Fig. S3**. Each marker represents a single IDR, color-coded as in **Fig. 5A**, with stronger purple (green) markers showing a stronger (weaker) entropic force compared to the GS repeat of the same size.
